# Supplementary material for: The Phosphofructokinase Isoform AtPFK5 Is a Novel Target of Plastidic Thioredoxin-f-Dependent Redox Regulation
Source: PubMed Central journal article supplement (PMC7998735; doi:10.3390/antiox10030401), 2021-03-07
Supplement: antioxidants-10-00401-s001.pdf [file antioxidants-10-00401-s001.pdf]

**The phosphofructokinase isoform AtPFK5 is a novel target of plastidic thioredoxin-f-dependent redox regulation**

Natalia Hess, Simon Richter, Michael Liebthal, Karl-Josef Dietz, Angelika Mustroph

**SUPPLEMENTARY DATA**

**Supplementary Figures**

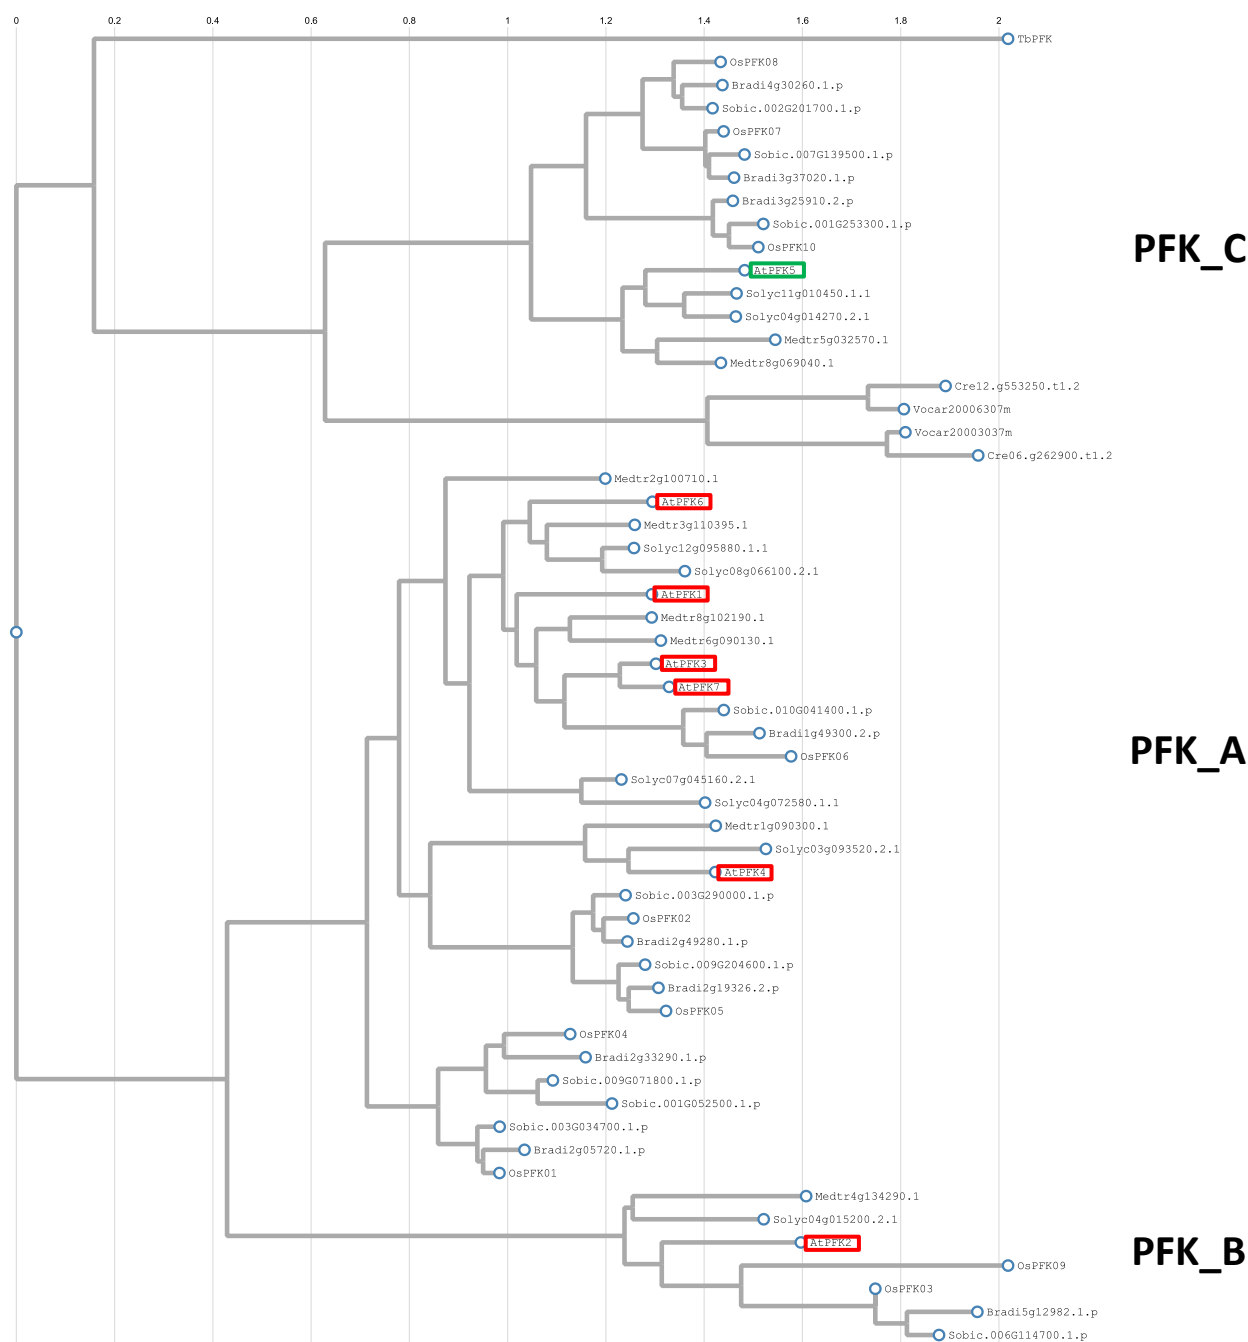

**Supplementary Figure S1:** Phylogeny of plant phosphofructokinase isoenzymes. PFK protein sequences were obtained from Phytozome and aligned using ClustalW using the platform <https://www.genome.jp/tools-bin/clustalw#clustalw.aln>. The phylogenetic tree was constructed with function "build" of ETE3 v3.1.1 (Huerta-Cepas et al., 2016) as implemented on the GenomeNet (<https://www.genome.jp/tools/ete/>). Species are abbreviated as follows: At, *Arabidopsis thaliana*; Bradi, *Brachypodium distachyon*; Cre, *Chlamydomonas reinhardtii*; Medtr, *Medicago truncatula*; Os, *Oryza sativa*; Sobic, *Sorghum bicolor*; Soly, *Solanum lycopersicum*; Tb, *Trypanosoma brucei*; Vocar, *Volvox carteri*. Protein IDs are found in Supplementary Table S1b. PFKs from Arabidopsis are highlighted in red, the target isoform of this study, AtPFK5, is highlighted in green.

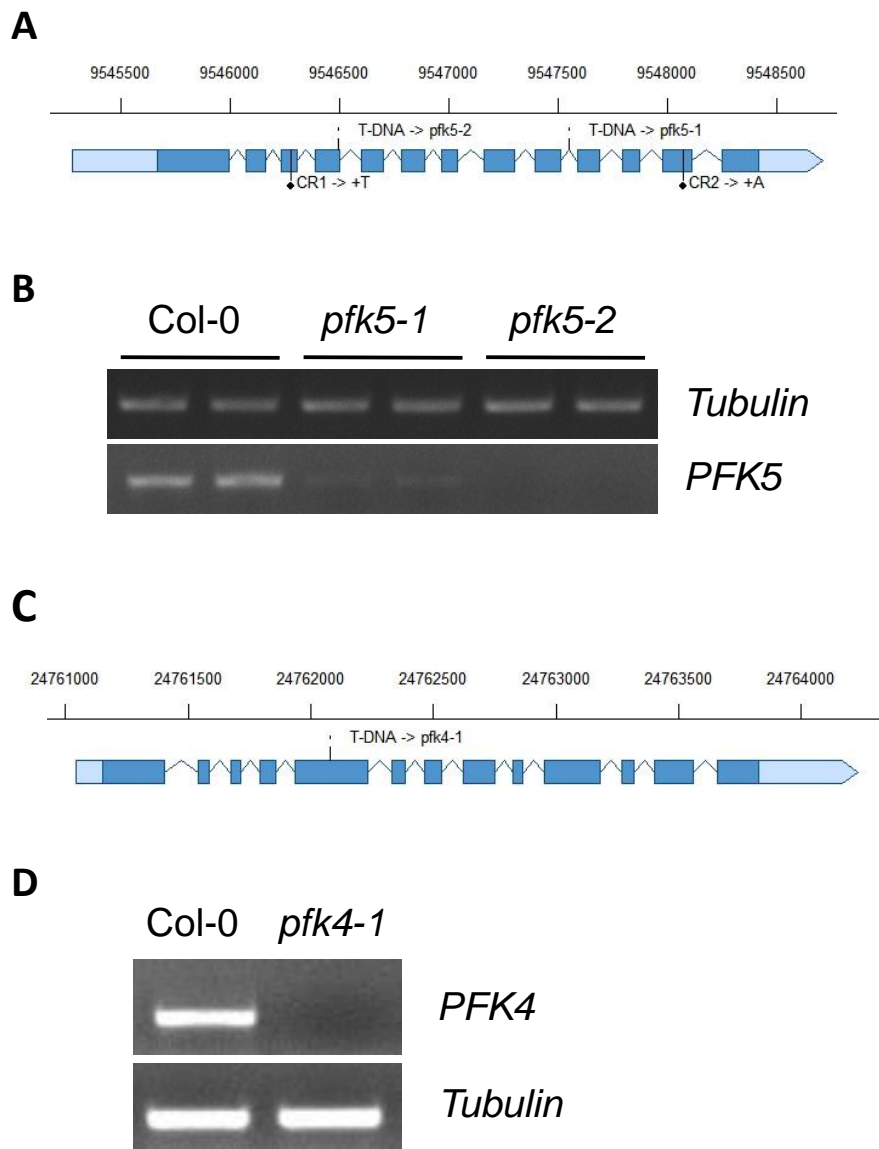

**Supplementary Figure S2:** Genotype characterization of T-DNA and CRISPR mutants for *AtPFK4* and *AtPFK5*. (A, C) Gene models for *AtPFK5* and *AtPFK4*, including site of mutations. (B, D) Transcript levels of *AtPFK5* and *AtPFK4* in wildtype Col-0 and T-DNA insertion mutant seedlings. Tubulin was used as the reference.

**Supplementary Figure S3 (continued over the next pages):** Alignment of plant phosphofructokinase isoenzymes, which is the basis for the phylogenetic tree presented in Supplementary Fig. S1. Cys residues are in red font, and conserved motifs are marked with asterisks above the alignment.

```

Solyc04g014270.2.1 1 -----MESLSPAIGQKAIFFPSTTGYT-----DHDLFSDSVKVRTERNFNRACRRLRIRVQ 50
Solyc11g010450.1.1 1 -----MESLSPAIGSNPIRPTTTISG-----ENELLISSVKSIKLPPVARRKMRMRVAAQ 50
AtPFK5 1 -----MDALSQAISSGIVPYKNNSSSLVPSHGLTSLILRKSRSVPNPSRSRVSVRASE 55
Medtr5g032570.1 1 -----MNTHVITPNLNTLLHHHHHHVHGLTNSSHRYSKTNHRLFHSHFKVSNVNR 50
Medtr8g069040.1 1 -----MASISHAITTTTNPYFNLPHQQTTPSSILTLSHSNSRRVFKNVGVF 46
OsPFK07 1 -----MAVSLKSSGSFCST-PPQWLHSTRDRILYGYSHSNAKECTCKKTKRPAPL 49
Bradi3g37020.1.p 1 -----MAVALKTIGSFCNT-QQQCLHSTRDRILYGYSHSNTKECKSKNAKRPA 49
Sobic.007G139500.1.p 1 -----MAGALKTNGSFCSTQQQFLQSTTDQFLHGSSHLNFKHCKSKTKIKPA 50
Sobic.002G201700.1.p 1 -----MTLSGMAVAFKASTSSSTTQQHWP-SPTKDRCQYGFQTQLSRQYRKKFAAL 49
Bradi4g30260.1.p 1 -----MSSSPAMAIAFKASTSYFTAQQLCGHSTWQCQNGFTHLNERKSRKGSAA 51
OsPFK08 1 -----MTFSGMDIALKASTHSSTSQHHLHSTRYRCQYGLGSTHLNKRKSPMVL 50
OsPFK10 1 -----MALKSPVDFAGSITSGQKDPCCFVGPCGN-PRCVRYNKKSRCRLV 45
Sobic.001G253300.1.p 1 -----MALAPMDYAGSISGGKYLGRFGVPTSSRLRWVGYDTKSRT-YQLV 45
Bradi3g25910.2.p 1 -----MAIASPVYAGPITSGQRRLCFPVHCSNHLRCNAYEKKSRTSQQLV 47
Cre06.g262900.t1.2 1 -----MRLQRHAAAGLGATKHRDTLTARLPCQSTRGRAALQVACVATPHSA 46
Vocar20003037m 1 -----MRLQRLARTNASLGGQRRLCVGPCCRSAPGRTRMQVCVAETSET 46
Cre12.g553250.t1.2 1 -----MRLQRHAPGFTKVSRQCKPSVPI 24
Vocar20006307m 1 -----MRLQQRQVIGRSLPVCVCTRCRKL 26
Medtr6g090130.1 1 ----- 1
Medtr8g102190.1 1 ----- 1
AtPFK3 1 ----- 1
AtPFK7 1 ----- 1
Sobic.010G041400.1.p 1 -----MAPPASPADSAPDPRPIASAPVPI TVPSLRDHTHHHLVDRDTPRVRAWDWEPE 55
Bradi1g49300.2.p 1 -----MASPSRTTDAATDPAPTAPIAVPSLRARLPHAHHLLDRDTPRRPAWWSERA 54
OsPFK06 1 -----MASPPTASASASEAAESGRRSAPGPI DVPSPRDLHLLDRDTPRVVHVEGTTM 55
AtPFK1 1 ----- 1
Solyc08g066100.2.1 1 ----- 1
Solyc12g095880.1.1 1 ----- 1
Medtr3g110395.1 1 ----- 1
AtPFK6 1 ----- 1
Solyc04g072580.1.1 1 ----- 1
Solyc07g045160.2.1 1 ----- 1
OsPFK01 1 -----MEAVGVAPAPAGVPEKKLLEVKES- 24
Sobic.003G034700.1.p 1 -----MEAVGVAPAPVAAPKLLDLKDP 25
Bradi2g05720.1.p 1 -----MESVVVAPAAAAQGAVAVAEQQQKLLDQKMEL 35
OsPFK04 1 -----MEAAVVVAAPIPAADAAKALEKKLLDLEL 30
Bradi2g33290.1.p 1 -----MEAAQTVVLASVPASTAGVPQHKI 24
Sobic.001G052500.1.p 1 -----METATVVVAPAVAITQPP-QQLMEL 25
Sobic.009G071800.1.p 1 -----METATVVVAPAVSITQPPQHKLMEL 26
Medtr2g100710.1 1 ----- 1
OsPFK02 1 -MASHIILPKEEE-----AALGVAVEEDHDSPAAPGYQHQQGPPVAKALPFSATCVRI SRDSYP 58
Bradi2g49280.1.p 1 -MASHIILPKEEE-----EGLGVAVEADHDSPEPP--RYQAEVPVKALPFSATCVRI SRDSYP 57
Sobic.003G290000.1.p 1 MASSHIILPKEEEEEKEAAVAEAGLGVGEADHDSPAQR--PYQEAPGKAALPFSATCVRI SRDSYP 68
Sobic.009G204600.1.p 1 -MASHIILPPDDADENHNHQAEEEEEREELGRDEDADDEEHG-HGHPALPPKAALPFSATCVRI SRDSYP 68
Bradi2g19326.2.p 1 -MASHIILPPDDEEQQRDEEEDGGQ-----SASEHAPLPFSAMCVRI SRDSYP 48
OsPFK05 1 MASSHIILPPDDDEEQRRLEEEEDDPWARGPPP-----AAPEHAMKAALPFSATCVRI SRDSYP 62
AtPFK4 1 -----MEASISFLGSTKPNISLFPNPNVLPDRDFPLPALKLKKVSVLPRI 46
Solyc03g093520.2.1 1 -----MEFSLYNSSSLRFQNDLPLHNRSTLGSFHTFSIKKLASKSISTCRPL 49
Medtr1g090300.1 1 -----MDLSSSSSVYTSFSSLSKTPPSFSLSSSSSSSRQNSLQLLLLRSHLPQRALFLRN 55
Sobic.006G114700.1.p 1 -----MDP 3
Bradi5g12982.1.p 1 ----- 1
OsPFK03 1 ----- 1
AtPFK2 1 ----- 1
Medtr4g134290.1 1 ----- 1
Solyc04g015200.2.1 1 ----- 1
OsPFK09 1 ----- 1
TbPFK 1 ----- 1
Clustal Consensus 1 ----- 1

```

**Solyc04g014270.2.1** 51 PKNAAAGVGGIDFSDPDWKLKYSREFEARFNI PHMTDVFDPDAVSYPSTFCLKMRTPI TEKFAEGYPSDEK 120  
**Solyc11g010450.1.1** 51 SSNFVVPNN-IDFNPDWVKYEREFEARFNI PHITDLFPDAVSYPSTFCLKMRTPVTEDFDAQGYPSDEE 119  
**AtPFFK5** 56 IQHSKTSASSIDLSDPDWKLKYEKDFEQRFSPHITDVLDPDAEAI RSTFCLKMRS-ETEDFVGGYPSDEE 124  
**Medtr5g032570.1** 51 VFSELKSQNKIDYNDPDWKKDFKEDFEARFRLPHITDIFPDASSMRSTFCLKMRAPI TRDFHGNYSGEE 120  
**Medtr8g069040.1** 47 AEHRNSSSTSIDFNPDWKKFQDFESRFLPHITDIFPDSPI PSTFCLRMRTPI GKDIPGHYTLDEE 116  
**OsPFFK07** 50 CVKATSTKVELDFNDPDSWKQKQFQEDWDKRFNLPRITDIYDLK-PRPTTFS LKKNRSPAGDENG--TPMDK 116  
**Bradi3g37020.1.p** 50 CVKATSTKVELDFSDPSWKQKQFQEDWDERFNLPRITDIYDDLKPRPTTFS LKKNRTRSDSDS--TPMDM 117  
**Sobic.007G139500.1.p** 51 CVRATSSKVELDFHDPSPWKQKQFQEDWERRFNLPSITDIYDLK-PRPTTFS LKKNRRTTGDEN----VDM 114  
**Sobic.002G201700.1.p** 50 HVTATSGKLDLDFDTPSWNKYQEDWNRRLSLPHITDIYDLE-PRRTTFS LKKNRIPLGDGDG--SSADM 116  
**Bradi4g30260.1.p** 52 HVRAISRNLDFSDPSWKQKQFQEDWDRFSLPHITDIFDLK-PRLTFS LKKNRTEPLGNDG--SSPDM 118  
**OsPFFK08** 51 SVRAVSGKSLDFSDPSWKKEKYQEDWNRRLSLPHITDIYDLK-PRLTFS LKKNRDTGGG----LSADK 114  
**OsPFFK10** 46 TRAISVDRPQLDFSNSDWKKQFQEDFRRFSLPHLKDVIDVE-PRPTTFS LKRS-RTPLENVNG--SMQGS 111  
**Sobic.001G253300.1.p** 46 ARAISVDQPQLDFSNPDWKKQFQEDFNKRFSLPHLRDVIDVE-PRPTTFS LKRS-RTPLENVNG--TMQES 111  
**Bradi3g25910.2.p** 48 IRAISVDRPQLDFSIDPDKNLFQEDRRFSLPHLTDVIHLE-PRPTTFS LKRS-RTPLENGSG--PFDES 113  
**Cre06.g262900.t1.2** 47 DSQKGAPKATATPSGQYVSSPYGAGRVLTSPSPGSI DDDVLELKNLRNYLVPRDSEFIVDNN-----Q 110  
**Vocar20003037m** 47 AKQGPSPPPTLS-SGAYVTNSFGAGRVSRDS----LDEEDVLELKNLRNYLVPRDSEFIVDNN-----H 105  
**Cre12.g553250.t1.2** 25 ARQPRRSVCARATPGADLTNYVIEPV-----SFGEDAVLECP EMRSKLVVVRPSEFVTHNN-----F 81  
**Vocar20006307m** 27 ITVPRARPTPAATSGADLTTSYIIEPV-----SFGEDAVLECP DMRSKLQPRPSEFVVHNN-----F 83  
**Medtr6g090130.1** 1 -----MGLTEPKVVTGPAGYVLEDVPHLSDYIPDLP-----TYPNPLQDNPA---YSVV 46  
**Medtr8g102190.1** 1 -----MGSSPNSKPKIVRGSAGYILEDVPHLTDYIPDLP-----TYPNPLQDNPA---YSVV 49  
**AtPFFK3** 1 -----MSTVESSPKKIINGS CGGVLEDVPHLSDYLPDLP-----TYPNPLQDNPA---YSVV 49  
**AtPFFK7** 1 -----MSSPNSKPKIVRGSAGYILEDVPHLTDYIPDLP-----TYPNPLQDNPA---YSVV 49  
**Sobic.010G041400.1.p** 56 RNRRG-----GAMDGAAAALVSGEAGYVLEDVPHVSDYLPDLP-----TYPNPLQDNPA---YSVV 109  
**Bradi1g49300.2.p** 55 TREAM-----DGTAAKPEPTKLVAGEAGYVLEDVPHLSDYLPDLP-----TYPNPLQDNPA---YSVV 108  
**OsPFFK06** 56 QRQRGEAAGDAGAAAAAKPEVKLVTDGGYVLEDVPHVCDYLPDLP-----TYPNPLQDNPA---YSVC 116  
**AtPFFK1** 1 -----MSSVFNDRKIVTGPAGYILEDVPHFSDDFPDHP-----TYPNPLQDNPA---YSVV 50  
**Solyc08g066100.2.1** 1 -----MGTESKYQMKVVGDFGVLEDVPHLTDYIPNIP-----IFDNPLRNSNA---YSVV 49  
**Solyc12g095880.1.1** 1 -----MGTESNYQMKVVKGDHGVLEDVPHLTDYIPDLP-----THDNPLRNSNA---YSVV 49  
**Medtr3g110395.1** 1 -----MASSESQMKVVGDFGVLEDVPHLSDYVNLPL-----TYPNPLRNSNA---YSVV 50  
**AtPFFK6** 1 -----MASNGVDEQIKLVEGPAGYVLEDVPHLSDYILDLP-----TYPNPLQSNAA---YSVV 50  
**Solyc04g072580.1.1** 1 -----MGSLVDSFALHNLKIKVMGDNGYVLEDVPHLSDYIPSLP-----TYPNPLKKNPS---YSVV 55  
**Solyc07g045160.2.1** 1 -----MGEVTNSQQKKKIVIGDDGVLEDVPHLSDYIPNLP-----TYTNPLQHNPS---YSVV 52  
**OsPFFK01** 24 -RKAAPAAPSTSMAAKWAMKKLVGGDAGYVLEDVPHLTDYLPDLP-----TYPNPLQDNPA---YSVV 84  
**Sobic.003G034700.1.p** 26 FPAAANGSAKASPAKWAMKKLVGGDAGYVLEDVPHLTDYMPHLP-----TYPNPLQDNPA---YSVV 86  
**Bradi2g05720.1.p** 36 PLVAALKA PAPASPCKWAMKKLVGGDAGYVLEDVPHLTDYMPDLP-----TYPNPLQDNPA---YSVV 96  
**OsPFFK04** 31 PFPFAPAKKAAAKVVAAPKKKLAGGAGYVLEDVPHLTDYLPNLP-----SFPNPLQNHPA---YSVV 91  
**Bradi2g33290.1.p** 25 LDLKVMADPAVQAPARKTKKLSAGGGYVLEDVPHLKDYLPHLP-----SYPNPLQNHPA---YSVV 85  
**Sobic.001G052500.1.p** 26 KFSFAPVAKSSPATKAEPDKKLTGGCGGVLEDVPHLTDYLPDLP-----SYPNPLQDHPA---YSVV 86  
**Sobic.009G071800.1.p** 27 KPFAAFAVAKSPARKAKPAKKLKAGCGGVLEDVPHLTDYLPDLP-----SYPNPLQDHPA---YSVV 87  
**Medtr2g100710.1** 1 -----MVDSSSTSHVEANTHVSDFLLEDVPHLSDYIPDLP-----TYPDPLQDNPS---YSVV 49  
**OsPFFK02** 59 NLRALRNASAMSLPDDDAAYAKLEEGDYGYLDDVPHFTDYLSDLPL-----TFPNPLQDHPA---YSTV 119  
**Bradi2g49280.1.p** 58 NLRALRNASAVSLRDDDADFVKLEEGDYGYLDDVQHLTDYLPDLP-----TFPNPLQDHPA---YSTV 118  
**Sobic.003G290000.1.p** 69 NLRALRNASTMALHDDDAAFVKEEGDFGVYVLDVPHLTDYLPDLP-----TFPNPLQDHPA---YSTV 129  
**Sobic.009G204600.1.p** 69 NLRALRNASSVSLAD--AAYVKISEGDYGYVLDVPHFTDYLPDIP-----TYPNPLQDHPA---YSTV 127  
**Bradi2g19326.2.p** 49 NLRALRNASAVSLAD--AAYAKISEGDFGVYVLDVPHLADYLPDIP-----TYPNPLQDHPA---YSTV 107  
**OsPFFK05** 63 NLRALRNASSVSLAD--AAYVKISEGDFGVYVLDVPHLVDHLPDAP-----TYPNPLQDHPA---YSTV 121  
**AtPFFK4** 47 LHQKRLIRAQCS DGFKPE-----EDDGFVLEDVPHLTKFLPDLP-----SYPNPLKESQA---YAIV 100  
**Solyc03g093520.2.1** 50 IWRRPLVRRNAQTATSNASGDKHGDDFIVEDVPHLTHFLPDLP-----SYTNPLKKSQA---YAIV 110  
**Medtr1g090300.1** 56 PILPPFSTRQNLPLAPVVRVSNQSENDGFLLEDVPHLTFNLPNLP-----SYPNPLQTSQA---YSIV 116  
**Sobic.006G114700.1.p** 4 TAARSSGGTPAAAENDATAPTNTVTVLPPLTLRDPVRLPSALASAASPSPTPAVQNEISRHPY---FHPP 70  
**Bradi5g12982.1.p** 1 ---MDPTTPSSGDHTASTPTNTVTVLPPLTLRDPVRLPAADP-----IPNEISSRPEC---FHPP 53  
**OsPFFK03** 1 -----MAAETSIRKLPSLSGLRHR-----RNPLEDNPNY---FHPS 32  
**AtPFFK2** 1 -----MDGSSSSSSSSLEEDVTNLFEPKIKLDLPHLNHYISN-----LKTFPNPLDQNPY---FHPT 56  
**Medtr4g134290.1** 1 -----MSNSSPISISISNVQLQHISHLTNYNS-----QIKHTNPLAVNPF---FRTP 44  
**Solyc04g015200.2.1** 1 -----MDDGGETPMPSELEHLKLP TLAGAAIP-----NPIARHPL---YHPS 38  
**OsPFFK09** 1 -----MAVESRSRVTSKLVKAHRAMLNSVTQEDLKVDRPLPG---ADYPNBSKKYSS----- 48  
**TbPFFK** 1  
**Clustal Consensus** 1

```

*****
Solyc04g014270.2.1 121 WHGYINNDRLVLLKVINYSPTSAGA-----E C I D S N C S W V E Q W V H R A G P R E K I F F K 172
Solyc11g010450.1.1 120 WHGYINNDRLVLLKTYNYSPTSAGA-----E C I D P D C T W V E Q W V H R A G P R E K I Y F K 171
AtPFFK5 125 WHGYINNDRLVLLKVTYSPTSAGA-----E C L D H D C S W V E Q W I H R A G P R E K I Y F R 176
Medtr5g032570.1 121 WNGYISDNDRLVLLKTYHSSPTSAGA-----Q C I D P G C N W V E Q W V H R A G P R K N I Y F K 172
Medtr8g069040.1 117 WNGYINNDRLVLLKTYNYSPTSAGA-----E C I D P D C T W V E Q W V H R A G P R E K I Y Y K 168
OsPFFK07 117 WNGYVNSDRALLKVIKYSSPNSAGA-----E C I D P D C S W V E Q W V H R A G P R K E I Y Y E 168
Bradi3g37020.1.p 118 WNGYVNNDDRALLKVIKYSSPTSAGA-----E C I D P D C S W V E Q W V H R A G P R K E I Y Y E 169
Sobic.007G139500.1.p 115 WNGYVNNDDRALLKVIKYSSPTSAGA-----E C I D P D C S W V E Q W V H R A G P R K E I Y Y E 166
Sobic.002G201700.1.p 117 WNGYVNKSDRALLKVIKYASPTSAGA-----L C I D P D C S W V E H W V H R A G P R K E I Y Y E 168
Bradi4g30260.1.p 119 WNGYVNKDDRALLKVIKYASPTSAGS-----E C I D P D C S W V E H W V H R A G P R K E I Y Y E 170
OsPFFK08 115 WNGYVNKDDRALLKVIKYASPTSAGA-----E C V D P D C S W V E H W I H R A G P R K E I Y Y E 166
OsPFFK10 112 WNGYVNNDDRALLKVIKFASPTSAGA-----D C I D P D C S W V E Q W V H R A G P R K Q I Y F E 163
Sobic.001G253300.1.p 112 WNGYVNNDDRALLKVIKFASPTSAGA-----D C I D P D C S W V E Q W V H R A G P R K Q I Y F E 163
Bradi3g25910.2.p 114 WNGYVNNDDRALLKVIKFASPTSAGA-----D C I D P D C S W V E Q W V H R A G P R K Q I Y F E 165
Cre06.g262900.t1.2 111 GGGFVGDRLRIRLHTVEFESTESAGS-----F C A D G V L T N G D E D S C I L L P E W A I R C G P R K T I Y F D 170
Vocar20003037m 106 GGGFVGDRLRIRLHTVEFESAESAGS-----F C A D G V L T H G D E D S C I L L P E W A I R C G P R K T I Y F D 165
Cre12.g553250.t1.2 82 GGGFVSDQDRVALNSMRFAFASAGASRSNFFPHGGKGGINVLEASMDQLNMTLPPWAI R A G A R R E I Y F D 151
Vocar20006307m 84 GGGFVSDNRVALNSMRFAESAESAGASRTSGEGQ-AKSSVNVLEASMDQLNMTLPPWAI R A G A R K E I F F D 152
Medtr6g090130.1 47 KQYFVHVDITVPQKVVVHKDSP-----R G V H F R R A G P R Q K V Y F E 85
Medtr8g102190.1 50 KQYFVHIDDVSPQKIVVHKDSP-----R G I H F R R A G P R Q K V Y F K 88
AtPFFK3 50 KQYFVDADDVSPQKIVVHKDGP-----R G I H F R R A G P R Q K V Y F E 88
AtPFFK7 50 KQYFVHADDSVPEKVVVHKDGP-----R G V H F R R A G P R Q K V Y F E 88
Sobic.010G041400.1.p 110 KQYFVNPDITVCKQKIVVHKDGP-----R G N H F R R A G P R Q R V Y F E 148
Bradi1g49300.2.p 109 KQYFVNPDITVCKQKIVVHKGGA-----R G N H F R R A G P R Q R V Y F E 147
OsPFFK06 117 RQYFVNPDITVCKQKIVVHKDGP-----R G N H F R R A G P R Q R V Y F E 155
AtPFFK1 51 KQYFVDEDDITVPQKIVVHKDSP-----R G T H F R R A G P R Q R V Y F E 89
Solyc08g066100.2.1 50 KQYFVDMDDITVPQKIVVHKDSQ-----R G V H F R R A G P R Q K V Y F N 88
Solyc12g095880.1.1 50 KQYFVDMDDITVPQKVVVHKDSP-----R G V H F R R A G P R Q K V Y F N 88
Medtr3g110395.1 51 KQYFVHMDITVPQKVVVHKDGP-----R G V H F R R A G P R Q K V Y F R 89
AtPFFK6 51 RQYFVDEDDITVQEKIVVHKDSP-----R G T H F R R A G P R Q K V Y F K 89
Solyc04g072580.1.1 56 NQYFVDEDDITVAQNIIVVKNKSP-----R G I H F R R A G P R Q K V Y F E 94
Solyc07g045160.2.1 53 KQYFVNEDDITVAEKVVVHKNSP-----R G I H F R R A G P R Q K V Y F E 91
OsPFFK01 85 KQYFVNTDDITVTQKIVVHKTS A-----R G T H F R R A G P R Q R V Y F Q 123
Sobic.003G034700.1.p 87 KQYFVNPDITVTQKIVVHKTS A-----R G T H F R R A G P R Q R V Y F Q 125
Bradi2g05720.1.p 97 KQYFVNTDITVTQKIVVHKTS A-----R G T H F R R A G P R Q R V Y F Q 135
OsPFFK04 92 KQYFVNADDITVAKKIVVHKGSA-----R G T H F R R A G P R Q R V Y F Q 130
Bradi2g33290.1.p 86 KQYFVNPGDITVSKKIVVHSSA-----R G T H F R R A G P R Q R V Y F Q 124
Sobic.001G052500.1.p 87 KQYFVKPDEITVAKKVVVHKSSA-----R G T H F R R A G P R R R V Y F Q 125
Sobic.009G071800.1.p 88 KQYFVNPDITVAKKIVVHKSSA-----R G T H F R R A G P R Q R V Y F Q 126
Medtr2g100710.1 50 KQYVYHPDITVAQQIVVHKNSP-----R G T L F R R A G P R Q K V Y F D 88
OsPFFK02 120 KQYFVNADDITVPEKVVVQKDSP-----R G V H F R R A G P R Q R V Y F E 158
Bradi2g49280.1.p 119 KQYFVNADDITVPEKVVVQKNSP-----R G V H F R R A G P R Q R V Y F E 157
Sobic.003G290000.1.p 130 KQYFVNADDITVPEKVVVQKNSP-----R G V H F R R A G P R Q R V Y F E 168
Sobic.009G204600.1.p 128 KQYFVNEDDITVPQKVVVQKNSR-----R G V H F R R A G P R Q R I Y F G 166
Bradi2g19326.2.p 108 KQYFVNEDDITVPQKVVVQKNSR-----R G V H F R R A G P R Q R V Y F E 146
OsPFFK05 122 KQYFVNEDDITVPQKVVVQKNSR-----R G V H F R R A G P R Q K V Y F E 160
AtPFFK4 101 KRTEFVSSDITVAQNIIVVQKGSK-----R G V H F R R A G P R E R V Y F R 139
Solyc03g093520.2.1 111 KKTEFVSPEDMVAKEIIVQKDS P-----R G I H F R R A G P R E K V F E T 149
Medtr1g090300.1 117 KNTFVSPEDITVAQTIIVVQKNSP-----R G V H F R R A G P R E K V Y F K 155
Sobic.006G114700.1.p 71 ATFYISPGDITLRLHRAFFDLA-----S A A P S P L V A Y R R A G P R G E I A V D 112
Bradi5g12982.1.p 54 PTFYISPGDITSLRRAFFDLA-----S G T P D P L V A Y R R A G P R G S L A V D 95
OsPFFK03 1-----1
AtPFFK2 33 NGFYITPSDITVLAQVAYDHS-----A H S Q S -R V A Y H R A G P R R E I M Y E 73
Medtr4g134290.1 56-----Q L Q H F Y I T N N N L-----V F S H S T R F A Y R T A G P R N N V F E N 90
Solyc04g015200.2.1 45 PGFFLTSSDITVLRHNVLDLSTG-----F P S P N P P L A Y H R A G P R N Q I L F D 88
OsPFFK09 39 PSFFISPTDITVLRDILFDASPASAA-----E R R R R H V A A Y H R A G P R R E V A F D 86
ThPFFK 49 RTEFRDKTDYIMYNPRPRDEPSSNP-----V S V S P L L C E L A A A R S R I H F N 94
Clustal Consensus 1-----1

```

```

          *****
Solyc04g014270.2.1 173 PEEVKAIVTCGGGLCPGLNDVIRQIVITLLEIYGVKK--IVGIPFGYRGFSEK-GLAEMPLSRKVVQNVHL 239
Solyc11g010450.1.1 172 PEEVKAIVTCGGGLCPGLNDVIRQIVITLLEIYGVKQ--IVGIPFGYRGFSNN-DLAEMPLSRKVVQNVHL 238
AtPFK5 177 PEEVKAIVTCGGGLCPGLNDVIRQIVITLLEIYGVKN--IVGIPFGYRGFSDK-DLTEMPLSRKVVQNIHL 243
Medtr5g032570.1 173 PEEVKAIVTCGGGLCPGLNDVIRQIVITLLEIYGVTE--IVGIPFGYRGFSDK-ELMEPLSRKVVQNIHL 239
Medtr8g069040.1 169 PEDVKAIVTCGGGLCPGLNDVIRQIVITLLEIYGVKK--IVGIPFGYRGFSDK-ELTEVPLSRKVVQNIHL 235
OsPFK07 169 PEEVKAIVTCGGGLCPGLNDVIRQIVITLLEIYGVKN--IVGIPFGYRGFSEK-GLKEMPLSRHLVENINL 235
Bradi3g37020.1.p 170 PEEVKAIVTCGGGLCPGLNDVIRQIVITLLEIYGVKN--IVGIPFGYRGFSEK-GLKEMPLSRDLVENINL 236
Sobic.007G139500.1.p 167 PABVKAIVTCGGGLCPGLNDVIRQIVITLLEIYGVKN--IVGIPFGYRGFSEK-GLKEMPLSRGLVENINL 233
Sobic.002G201700.1.p 169 PEEVKAIVTCGGGLCPGLNDVIRQIVITLLEIYGVKN--IVGIPFGYRGFSEK-GLKEMPLSRDVVENINL 235
Bradi4g30260.1.p 171 PEEVKAIVTCGGGLCPGLNDVIRQIVITLLEIYGVKN--IVGIPFGYRGFSEK-GLKEMPLSRDVVENINL 237
OsPFK08 167 PABVKAIVTCGGGLCPGLNDVIRQIVITLLEIYGVKN--IVGIPFGYRGFSEK-GLKEMPLSRKVVENINL 233
OsPFK10 164 PQYVKAIVTCGGGLCPGLNDVIRQIVITLLEKYGVKN--IVGIQHGFRGFED-HLAEVPLNRQVQNIHL 230
Sobic.001G253300.1.p 164 PQYVKAIVTCGGGLCPGLNDVIRQIVITLLEKYGVKN--IVGIQHGFRGFED-HLSEVPLSRHVVQNIHL 230
Bradi3g25910.2.p 166 PQSVKAGIVTCGGGLCPGLNDVIRQIVITLLEKYGVKN--IVGIQHGFRGFED-HLSEVPLNRHVVQNIHL 232
Cre06.g262900.t1.2 171 PQVSAAVVTCGGGLCPGLNDVIRQIVITLLEKYGVKN--IVGIQHGFRGFED-HLSEVPLNRHVVQNIHL 239
Vocar20003037m 166 PKQVSAAVVTCGGGLCPGLNDVIRQIVITLLEKYGVKN--IVGIQHGFRGFED-HLSEVPLNRHVVQNIHL 234
Cre12.g553250.t1.2 152 PSQTAAIVTCGGGLCPGLNDVIRQIVITLLEKYGVKN--IVGIQHGFRGFED-HLSEVPLNRHVVQNIHL 220
Vocar20006307m 153 PQQVTAIVTCGGGLCPGLNDVIRQIVITLLEKYGVKN--IVGIQHGFRGFED-HLSEVPLNRHVVQNIHL 221
Medtr6g090130.1 86 SDEIQAAIVTCGGGLCPGLNDVIRQIVITLLEKYGVKN--IVGIQHGFRGFED-HLSEVPLNRHVVQNIHL 151
Medtr8g102190.1 89 SDEVQAIVTCGGGLCPGLNDVIRQIVITLLEKYGVKN--IVGIQHGFRGFED-HLSEVPLNRHVVQNIHL 154
AtPFK3 89 SDEVHACIVTCGGGLCPGLNDVIRQIVITLLEKYGVKN--IVGIQHGFRGFED-HLSEVPLNRHVVQNIHL 154
AtPFK7 89 SDEVHACIVTCGGGLCPGLNDVIRQIVITLLEKYGVKN--IVGIQHGFRGFED-HLSEVPLNRHVVQNIHL 154
Sobic.010G041400.1.p 149 PDEVHACIVTCGGGLCPGLNDVIRQIVITLLEKYGVKN--IVGIQHGFRGFED-HLSEVPLNRHVVQNIHL 214
Bradi1g49300.2.p 148 SDEVHACIVTCGGGLCPGLNDVIRQIVITLLEKYGVKN--IVGIQHGFRGFED-HLSEVPLNRHVVQNIHL 213
OsPFK06 156 SDEVHACIVTCGGGLCPGLNDVIRQIVITLLEKYGVKN--IVGIQHGFRGFED-HLSEVPLNRHVVQNIHL 221
AtPFK1 90 SDDVLAIVTCGGGLCPGLNDVIRQIVITLLEKYGVKN--IVGIQHGFRGFED-HLSEVPLNRHVVQNIHL 155
Solyc08g066100.2.1 89 SDDVRAIVTCGGGLCPGLNDVIRQIVITLLEKYGVKN--IVGIQHGFRGFED-HLSEVPLNRHVVQNIHL 154
Solyc12g095880.1.1 89 SDDVRAIVTCGGGLCPGLNDVIRQIVITLLEKYGVKN--IVGIQHGFRGFED-HLSEVPLNRHVVQNIHL 154
Medtr3g110395.1 90 SDDVIAIVTCGGGLCPGLNDVIRQIVITLLEKYGVKN--IVGIQHGFRGFED-HLSEVPLNRHVVQNIHL 155
AtPFK6 90 PSDVRAIVTCGGGLCPGLNDVIRQIVITLLEKYGVKN--IVGIQHGFRGFED-HLSEVPLNRHVVQNIHL 155
Solyc04g072580.1.1 95 ADDVNAIVTCGGGLCPGLNDVIRQIVITLLEKYGVKN--IVGIQHGFRGFED-HLSEVPLNRHVVQNIHL 160
Solyc07g045160.2.1 92 PDDVYAIVTCGGGLCPGLNDVIRQIVITLLEKYGVKN--IVGIQHGFRGFED-HLSEVPLNRHVVQNIHL 157
OsPFK01 124 SDEVNAIVTCGGGLCPGLNDVIRQIVITLLEKYGVKN--IVGIQHGFRGFED-HLSEVPLNRHVVQNIHL 189
Sobic.003G034700.1.p 126 SDEVNAIVTCGGGLCPGLNDVIRQIVITLLEKYGVKN--IVGIQHGFRGFED-HLSEVPLNRHVVQNIHL 191
Bradi2g05720.1.p 136 SDEVNAIVTCGGGLCPGLNDVIRQIVITLLEKYGVKN--IVGIQHGFRGFED-HLSEVPLNRHVVQNIHL 201
OsPFK04 131 PDEVSAIVTCGGGLCPGLNDVIRQIVITLLEKYGVKN--IVGIQHGFRGFED-HLSEVPLNRHVVQNIHL 196
Bradi2g33290.1.p 125 PGEVVAIVTCGGGLCPGLNDVIRQIVITLLEKYGVKN--IVGIQHGFRGFED-HLSEVPLNRHVVQNIHL 190
Sobic.001G052500.1.p 126 SDEVRAIVTCGGGLCPGLNDVIRQIVITLLEKYGVKN--IVGIQHGFRGFED-HLSEVPLNRHVVQNIHL 191
Sobic.009G071800.1.p 127 PDEVTAIVTCGGGLCPGLNDVIRQIVITLLEKYGVKN--IVGIQHGFRGFED-HLSEVPLNRHVVQNIHL 192
Medtr2g100710.1 89 SEEVYAIVTCGGGLCPGLNDVIRQIVITLLEKYGVKN--IVGIQHGFRGFED-HLSEVPLNRHVVQNIHL 154
OsPFK02 159 SEDVKAIVTCGGGLCPGLNDVIRQIVITLLEKYGVKN--IVGIQHGFRGFED-HLSEVPLNRHVVQNIHL 224
Bradi2g49280.1.p 158 PEDVKAIVTCGGGLCPGLNDVIRQIVITLLEKYGVKN--IVGIQHGFRGFED-HLSEVPLNRHVVQNIHL 223
Sobic.003G290000.1.p 169 SEEVKAIVTCGGGLCPGLNDVIRQIVITLLEKYGVKN--IVGIQHGFRGFED-HLSEVPLNRHVVQNIHL 234
Sobic.009G204600.1.p 167 TDEVKAIVTCGGGLCPGLNDVIRQIVITLLEKYGVKN--IVGIQHGFRGFED-HLSEVPLNRHVVQNIHL 232
Bradi2g19326.2.p 147 SDEVKAIVTCGGGLCPGLNDVIRQIVITLLEKYGVKN--IVGIQHGFRGFED-HLSEVPLNRHVVQNIHL 212
OsPFK05 161 SDEVKAIVTCGGGLCPGLNDVIRQIVITLLEKYGVKN--IVGIQHGFRGFED-HLSEVPLNRHVVQNIHL 226
AtPFK4 140 SDEVKAIVTCGGGLCPGLNDVIRQIVITLLEKYGVKN--IVGIQHGFRGFED-HLSEVPLNRHVVQNIHL 205
Solyc03g093520.2.1 150 PEEVRAIVTCGGGLCPGLNDVIRQIVITLLEKYGVKN--IVGIQHGFRGFED-HLSEVPLNRHVVQNIHL 215
Medtr1g090300.1 156 AEEVRAIVTCGGGLCPGLNDVIRQIVITLLEKYGVKN--IVGIQHGFRGFED-HLSEVPLNRHVVQNIHL 221
Sobic.006G114700.1.p 113 PAAARAIVTCGGGLCPGLNDVIRQIVITLLEKYGVKN--IVGIQHGFRGFED-HLSEVPLNRHVVQNIHL 180
Bradi5g12982.1.p 96 PARARAIVTCGGGLCPGLNDVIRQIVITLLEKYGVKN--IVGIQHGFRGFED-HLSEVPLNRHVVQNIHL 163
OsPFK03 1 ----- 1
AtPFK2 74 PSAVKAIVTCGGGLCPGLNDVIRQIVITLLEKYGVKN--IVGIQHGFRGFED-HLSEVPLNRHVVQNIHL 139
Medtr4g134290.1 91 PSDVRAIVTCGGGLCPGLNDVIRQIVITLLEKYGVKN--IVGIQHGFRGFED-HLSEVPLNRHVVQNIHL 158
Solyc04g015200.2.1 89 PVTVRAIVTCGGGLCPGLNDVIRQIVITLLEKYGVKN--IVGIQHGFRGFED-HLSEVPLNRHVVQNIHL 154
OsPFK09 87 PATVRAIVTCGGGLCPGLNDVIRQIVITLLEKYGVKN--IVGIQHGFRGFED-HLSEVPLNRHVVQNIHL 153
ThPFK 95 PTETTTIVTCGGGLCPGLNDVIRQIVITLLEKYGVKN--IVGIQHGFRGFED-HLSEVPLNRHVVQNIHL 163
Clustal Consensus 1 ----- 1

```









Solyc04g014270.2.1 434 QEVKKYFKE---LGQADVKYIDPTYMIRACRANASDGILCTVLGQNAVHGAFAGYSGITVGIINTHYVY 500  
 Solyc11g010450.1.1 433 QQIKKYFKE---IGVTTDVKYIDPTYMIRACRANASDGILCTVLGQNAVHGAFAGYSGITVGIINTHYVY 499  
 AtPFFK5 438 QETKKYFKE---ISTPIDVKYIDPTYMIRAVRANASDGILCTVLGQNAVHGAFAGYSGITVGIINTHYAY 504  
 Medtr5g032570.1 434 QETKKNYFKE---NDIHADVKYIDPTYMIRACRANASDGILCTVLGQNAVHGAFAGYSGITVGIINTHYAY 500  
 Medtr8g069040.1 430 QETKKYFKE---IGVHADVKYIDPTYMIRACRANASDGILCTVLGQNAVHGAFAGYSGISVGIINTHYAY 496  
 OsPFFK07 436 QKIKMHFKD---IGVPADVKYIDPTYMVRA CRANASDAILCTVLGQNAVHGAFAGFSGITSGICINTHYVY 502  
 Bradi3g37020.1.p 431 QKIKMHFKG---IGVHADVKYIDPTYMVRA CRANASDAILCTVLGQNAVHGAFAGFSGITSGICINTHYVY 497  
 Sobic.007G139500.1.p 428 QKIKTHFKD---IGVPADVKYIDPTYMVRA CRANASDAILCTVLGQNAVHGAFAGFSGITSGICINTHYVY 494  
 Sobic.002G201700.1.p 430 QKIKKHFKD---IGVPADLVKYIDPTYMVRA CRANASDAILCTVLGQNAVHGAFAGFSGITSGVINTHYVY 496  
 Bradi4g30260.1.p 432 QKIKKHFKD---IGVLADLVKYIDPTYMVRA CRANASDAILCTVLGQNAVHGAFAGFSGITSGICINTHYAY 498  
 OsPFFK08 428 QKIKSHFKD---IGVPADVKYIDPTYMVRA CRANASDAILCTVLGQNAVHGAFAGFSGITSGICINTHYAF 494  
 OsPFFK10 425 QKIKAHFKE---IGVHSDVKYIDPTYMVRAVRA CRANASDAILCTVLGQNAVHGAFAGFSGITGGICINTHNVY 491  
 Sobic.001G253300.1.p 425 QKIKSHFKD---IGVHSDLVKYIDPTYMLRAVRA CRANASDAILCTVLGQNAVHGAFAGFSGITGGVINTHNVY 491  
 Sobic.003G25910.2.p 427 QKIKSHFNE---IGVHSDVKYIDPTYMLRAVRA CRANASDAILCTVLGQNAVHGAFAGFSGITGGVINTHNVY 493  
 Cre06.g262900.t1.2 433 NEFKKHFKG-----EADIKYIDPSYIMRSVPTTSDRIYCKVLGQCAVHGAFAGFTDVTGVLNTHYVY 496  
 Vocar20003037m 427 NELKKHFKG-----DADIKYIDPSYIMRSVPTTSDRIYCKVLGQCAVHGAFAGYTDITVGLNTHYVY 490  
 Cre12.g553250.t1.2 417 DKFKAYFK-----DADIKYIDPSYIMRSVPTTSDRIYCKLHANAVHGAFAGFTGTVGLNTHYVY 479  
 Vocar20006307m 418 EKFKAYFK-----DADIKYIDPSYIMRSVPTTSDRIYCKLHANAVHGAFAGFTGTVGLNTHYVY 480  
 Medtr6g090130.1 350 QSIKDHFAREK-TLPIT-LKYIDPTYMIRAVPSNASDNVYCTLLAQSAVHGAMAGYTGYSGLVNGRQTY 417  
 Medtr8g102190.1 354 HKIKDYFAKQK-TMGIT-LKYIDPTYMIRAVPSNASDNVYCTLLAQSAVHGAMAGYTGFTSGLVNGRQAY 421  
 AtPFFK3 353 QSIKDHFNQKK-MVMN--LKYIDPTYMIRAVPSNASDNVYCTLLAQSAVHGAMAGYTGYSGLVNGRQTY 419  
 AtPFFK7 352 QSIKDHFKKKN-MVMN--LKYIDPTYMIRAVPSNASDNVYCTLLAQSAVHGAMAGYTGYSGLVNGRQTY 418  
 Sobic.010G041400.1.p 412 QKINEYFKKN-MTIN--LKYIDPTYMLRAIPSNASDNVYCTLLAHSVHGAMAGYTGFTVGLNTHYVY 478  
 Bradi1g49300.2.p 411 QKINEHFKKTK-TTIN--LKYIDPTYMIRAIIPSNASDNVYCTLLAHSVHGAMAGYTGFTVGVNGRHCY 477  
 OsPFFK06 419 QKIKEHFKKTK-TTIN--LKYIDPTYMIRAIIPSNASDNVYCTLLAHSVHGAMAGYTGFTVGVNGRHCY 485  
 AtPFFK1 355 QRIKDHFAK-K-MTLT--LKYIDPTYMIRAVPSNASDNVYCTLLAQSAVHGVMAGYNGFTVGLNTHYVY 420  
 Solyc08g066100.2.1 354 HKIRDHFQKGL-KMPIT-LKYIDPTYMIRAVPSNASDNVYCTLLAQSAVHGAMAGYTGFTSGIVNGRQTY 421  
 Solyc12g095880.1.1 354 QKIRDHFQAKT-KMPIT-LKYIDPTYMIRAVPSNASDNVYCTLLAQSAVHGAMAGYTGFTSGLVNGRQTY 421  
 Medtr8g110395.1 354 HKIKDHFAKEN-KMAIV-LKYIDPTYMIRAIIPSNASDNVYCTLLAQSAVHGAMAGYTGFTAGLVNGRHTY 421  
 AtPFFK6 351 LKIKEYFAKH-VMDIT-LKYIDPTYMIRAIIPSNASDNVYCTLLAQSAVHGAMAGYTGFTVGLNTHYVY 418  
 Solyc04g072580.1.1 342 TRIKEHFSKEK-KMMIN-LKYIDPTYMIRAIIPSNASDNVYCTLLAQSAVHGAMAGYTGFTVGPVNTHYAY 409  
 Solyc07g045160.2.1 353 ERIKEHFSKQK-KMLIN-LKYIDPTYMIRAIIPSNASDNVYCTLLAQSAVHGAMAGYTGFTVGPVNTHYAY 420  
 OsPFFK01 388 QKIKDHFKKKR-NFPIT-LKYIDPTYMIRAVRSNASDNVYCTLLAHSALHGAMAGYTGFTVAPVNGRHA 455  
 Sobic.003G034700.1.p 390 QKIKDHFKKKR-SFPIT-LKYIDPTYMIRAVRSNASDNVYCTLLAHSALHGAMAGYTGFTVAPVNGRHA 457  
 Bradi2g05720.1.p 400 QKIKDHFKKKT-NFPIT-LKYIDPTYMIRAVRSNASDNVYCTLLAHSALHGAMAGYTGFTVAPVNGRHA 467  
 OsPFFK04 395 AKIKDHFKKKA-NFPIT-LKYIDPTYMIRAVPSNASDNVYCTLLAHSALHGAMAGYTGFTVAPVNGRHA 462  
 Bradi2g33290.1.p 389 QKIKEHFKKKT-NLPIT-LKYIDPTYMIRAVPSNASDNVYCTLLAHSALHGAMAGYTGFTVAPVNGRHA 456  
 Sobic.001G052500.1.p 390 QKIKEHFKKKT-RFPIT-LKYIDPTYMIRAVPSNASDNVYCTLLAHSALHGAMAGYTGFTVGPVNGRHA 457  
 Sobic.009G071800.1.p 391 HKIKEHFKKKT-SFPIT-LKYIDPTYMIRAVPSNASDNVYCTLLAHSALHGAMAGYTGFTVAPVNGRHA 458  
 Medtr2g100710.1 354 QKIKDHFEKSK-KIIN--LKYIDPTYMIRAIIPSNASDNVYCTLLAQSAVHGAMAGYTGFTVGPVNGRNCY 420  
 OsPFFK02 423 HKIKDYCKNKK-MEMT--LKYIDPTYMIRAIIPSNASDNVYCTLLAHSALHGAMAGYS-FTVGMVNGRHA 488  
 Bradi2g49280.1.p 422 HKIKDYCKSKK-MEMT--LKYIDPTYMIRAIIPSNASDNVYCTLLAHSALHGAMAGYS-STVGMVNGRHA 487  
 Sobic.003G290000.1.p 433 HKIKDYCKSKK-MEMT--LKYIDPTYMIRAIIPSNASDNVYCTLLAHSALHGAMAGYS-FTVGMVNGRHA 498  
 Sobic.009G204600.1.p 431 HKIKDYFKSKK-MEMT--LKYIDPTYMIRAIIPSNASDNVYCTLLAHSALHGAMAGYS-FTVGMVNGRHTY 496  
 Bradi2g19326.2.p 411 HKIKDHFKSKK-VEMT--LKYIDPTYMIRAIIPSNASDNVYCTLLAHSALHGAMAGYS-FTVGMVNGRHTY 476  
 OsPFFK05 425 HKIKDHFKSKK-MEMT--LKYIDPTYMIRAIIPSNASDNVYCTLLAHSALHGAMAGYS-FTVGMVNGRHA 490  
 AtPFFK4 404 QQIKDHFTNVR-KMMIN-MKYIDPTYMIRAIIPSNASDNVYCTLLAQSAVHGAMAGYSGFTVGPVNSRHAY 471  
 Solyc03g093520.2.1 414 QQIKDHFTNER-KMTIN-MKYIDPTYMIRAIIPSNASDNVYCTLLAQSAVHGAMAGFTGFTVGPVNSRHAY 481  
 Medtr1g090300.1 420 NKIKDHFTKLP-KMVVN-MKYIDPTYMIRAIIPSNASDNVYCTLLAHSALHGAMAGYSGFTVGPVNSKHAY 487  
 Sobic.006G114700.1.p 379 SELGRWVKREH-PDELFTVKYIDPTYMIRAVPANATDNLCTLLAHSALHGVMAGFTGFVPGPVGNTYSY 447  
 Bradi5g12982.1.p 362 SEVGRWVKREH-PSELFTVKYIDPTYMIRAVPANATDNLCTLLAHSALHGIMAGFTGFVPGPVGNTYSY 430  
 OsPFFK03 161 SELGKWKREH-PSELFTVKYIDPTYMIRAVPANATDNLCTLLAHSALHGIMAGYTGFTVPGPVGNTYSY 229  
 AtPFFK2 338 SVLKAWWEREH-PDELFTVKYIDPTYMIRAVPANATDNLCTLLAHSALHGVMAGYTGFTVPGPVGNTYSY 406  
 Medtr4g134290.1 357 SELKNWWRDH-PGELFTVKYIDPTYMIRAVHANATDNLCTLLAHSALHGVMAGYTGFTVAAIPVNGNYAY 425  
 Solyc04g015200.2.1 353 SELKNWWRDH-PNELFTVKYIDPTYMIRAVPPNATDNSYCTLLAHSALHGVMAGYTGFTVCGPVGNTYSY 421  
 OsPFFK09 358 AEMRAWWEEH-AGEVFTVKYIDPTYMIRAVPANATDNLCTLLAHSALHGAMAGYTGFTVSGTINGNAY 426  
 TbPFFK 355 EKVKAFLKANKSRYPDSTVKYIDPSYIMRACPPSANDALFCATLATTAVHGAMAGYTCIIMRHNHYIL 424  
 Clustal Consensus 58 :\*\*\*\*:\*:\*:\* . . : \* . \* . : \* : \* : : 79

```

*
Solyc04g014270.2.1 501 FPIPEVISKPRVVDPNSRMHRCLTSTGQPDFL----- 533
Solyc11g010450.1.1 500 FPIPEVIAQPKVVDPNSRMHRCLTSTGQPDFL----- 532
AtPFK5 505 LPITEVIAIYPKSVDPNSRMHRCLTSTGQPDFI----- 537
Medtr5g032570.1 501 FPITEVISHPQLVDPNSRMHRCLTSTGQPDFI----- 533
Medtr8g069040.1 497 FPIPEVISHPRLVDPNSRMHRCLTSTGQPDFI----- 529
OsPFK07 503 LPITEVITVPKRVNPNSRMHRCLTSTGQPDFH----- 535
Bradi3g37020.1.p 498 LPITEVITSPKRVNPNSRMHRCLTSTGQPDFH----- 530
Sobic.007G139500.1.p 495 LPITEVITASKRVNPNSRMHRCLTSTGQPDFH----- 527
Sobic.002G201700.1.p 497 LPITEVITTPKHVNPNSRMHRCLTSTGQPDFH----- 529
Bradi4g30260.1.p 499 LPITEVITTPKHVNPNSRMHRCLTSTGQPDFD----- 531
OsPFK08 495 LPITEVITKPKRVNPNSRMHRCLTSTGQPDFH----- 527
OsPFK10 492 LPISEVIKSTRFVDPNSRMHRCLTSTGQPDFH----- 524
Sobic.001G253300.1.p 492 LPIPEVIKSTRFVDPNSRMHRCLTSTGQPDFH----- 524
Bradi3g25910.2.p 494 LPIPEVIKSTRFVDPNSRMHRCLTSTGQPDFH----- 526
Cre06.g262900.t1.2 497 LPIPTIIQAARKVNPKGRMNRLITAIROPDMA----- 529
Vocar20003037m 491 LPIPMIIQAPRKVNPKGRMNRLIAAIIROPDFS----- 523
Cre12.g553250.t1.2 480 LPIPVIIQAPRKVDPRGKANRRLRAAIGQPSFQ----- 512
Vocar20006307m 481 LPIPVIIQAPRKVDPRGKANRRLRAAIGQPSFT----- 513
Medtr6g090130.1 418 IIFYRITERQNNVITDRMMARLLSSTNQPSFMEVKVSDSDTKGENSLDELDPDGHCSSEDTSVDEITHNLG 487
Medtr8g102190.1 422 IEFNRINEGQNTVITDRMMARLLSSTNQPSFLAKTAVEEKKKEEEEEEDSFNL----- 475
AtPFK3 420 IIFYRITERQNNVITDRMMARLLSSTNQPSFLGPKDVF--NKEKPSALLDDGNCNGVVDPVPTKEIT 488
AtPFK7 419 IIFYRITERQNNVITDRMMARLLSSTNQPSFLGPKDTSEEKKELPETPLDDG---AVDIPPVTKVET 484
Sobic.010G041400.1.p 479 IIFYRITERQNNVITDRMMARLLSSTNQPSFLCNKVVEEAKKEQERAAQLLDGSPSHRKG----- 539
Bradi1g49300.2.p 478 IIFYRITERQNNVITDRMMARLLSSTNQPSFLCKQDVEDAKVEDERTAKLLDGSPPSNPKVEDGLASSNS 547
OsPFK06 486 IIFYRITERQNNVITDRMMARLLSSTNQPSFLSKKDVEDAKMEEERASKFFDGPVPPNPKVEDKVASNGK 555
AtPFK1 421 IEFNRITERQNNVITDRMMARLLSSTNQPSFMKQADKIHSNQLVGEPPGTMKW----- 473
Solyc08g066100.2.1 422 IEFNRITERQNNVITDRMMARLLSSTNQPSFLSTNDIVQVHKRQHSQSOLLNGDENESITGTYLKVLVD 491
Solyc12g095880.1.1 422 IEFNRITERQNNVITDRMMARLLSSTNQPSFLRVKDIIEIKKEEQPTQLLDGDNVHENSNGH----- 485
Medtr3g110395.1 422 IEFNRITERQNNVITDRMMARLLSSTNQPSFLKPKDVHQIMKAGQSPQTLLGNSCNGGEEEAKKVQI 491
AtPFK6 419 IEFNRITERQNNVITDRMMARLLSSTNQPSFMNPPKGTTEFTD----- 462
Solyc04g072580.1.1 410 IEFDRITERQNNVITDRMMARLLSSTNQPSFLSTARSADNIEANKDEEPPIQLSDEETNQLSFLTTRVD 479
Solyc07g045160.2.1 421 IEFNRITERQNNVITDRMMARLLSSTNQPSFLRTR--VDI IKANKDEEPPQTQLSDDATTDDNLMKQIL 488
OsPFK01 456 IIFYRITERQNNVITDRMMARVLCSTNQPCFLSHEDVEHLKHDDDE--HHLHNTQLLEGESSPVKDSSKC 524
Sobic.003G034700.1.p 458 IIFYRITERQNNVITDRMMARVLCSTNQPCFLSHEDVENMKHDDDE--HHLHNTQLLEGESSPVKDASKC 526
Bradi2g05720.1.p 468 IIFYRITERQNNVITDRMMARVLCSTNQPCFLSHEDVENMKHDDDEQHHLHNTQLLDG--SPAKCSFKC 535
OsPFK04 463 IIFYRITERQNNVITDRMMARVLCSTNQPCFLSTEDVEKAGQD---DEEPIVPLVEGENSLVKAPPLL 528
Bradi2g33290.1.p 457 IIFYRITERQNNVITDRMMARVLCSTNQPCFLSHEDVEKARQD---EEEPHVPLIEGENSLVRTSPMS 522
Sobic.001G052500.1.p 458 IIFYRITERQNNVITDRMMARVLCSTNQPCFLTEEDVEGAGLEEEEEPHMMPLVEGGMQLRQGEQPV 527
Sobic.009G071800.1.p 459 IIFYRITERQNNVITDRMMARVLCSTNQPCFLTHEDEVEGAAGLDEEPP---HMPLVEGEYALVRSPPMC 525
Medtr2g100710.1 421 IEFHLINEGQKRVITDRMMARLLSSTHQPSTFVNPQHITBEAKVE----- 465
OsPFK02 489 IEFHRTVSTRNKVKITDRMMARLLSSTNQPSFLSQKDI DAAREADKLASKSPVNTKEHGENVKKPPANG 558
Bradi2g49280.1.p 488 IEFHRTVSTRNKVKITDRMMARLLSSTNQPSFLTQKDI DAAREADRLANRPVPAGTSELREHTEKHPAS 557
Sobic.003G290000.1.p 499 IEFHRTVSTRNKVKITDRMMARLLSSTNQPSFLSQKDI DAAREADKAANAKNQAPALANGEK----- 561
Sobic.009G204600.1.p 497 IEFYRVTSTRNKVKITDRMMARLLSSTNQPSFLSQKDI DAASEADRLANRPPLPTGASSRVARSFQSSS 566
Bradi2g19326.2.p 477 IEFYRVTSTRNKVKITDRMMARLLSSTNQPSFLSQKDI DAAREADRLANKPPLPSGANQSVANAFQGSAS 546
OsPFK05 491 IEFYRVTSTRNKVKITDRMMARLLSSTNQPSFLSQKDI DA AKENDRTANKPPLPTGLSHHVANSFDQAS 560
AtPFK4 472 IPTSQVTEVTNTVKLITDRMMARLLSSTNQPSFLTGEALQNVIDMETQEKIDNMKISSI----- 530
Solyc03g093520.2.1 482 IEFNRVTEVTNTVNMTRGRMMARLLSSTNQPSFVN--HQTLRERVDKNTIDAINNMKINST----- 539
Medtr1g090300.1 488 IPIACVTERPNTVQLTGRMMARLLSSTNQPSFVS---SDQQRVEKEMVEDTNKMNITSI----- 543
Sobic.006G114700.1.p 448 IPLEDVAVAKNPVDVNDHKKAWVRSVFNQPDFLKSQA----- 484
Bradi5g12982.1.p 431 IPLEDVAVAKNPVDVNDHKKAWVRSVFNQPDFLKPQDY----- 468
OsPFK03 230 IPLEDVAVAKNPVDVNDHKKAWVRSVFNQPDFMFKPKY----- 266
AtPFK2 407 IPLEEVAQTKNQVNTDRHKKAWVRSVFNQPDFETNVKG----- 444
Medtr4g134290.1 426 IPLEDVAVAKNPVNTKDHNNQSWVRSVFNQPDFLKS----- 460
Solyc04g015200.2.1 422 IVDVAVAKARKVDTRHKKAWVRSVFNQPDFFIRS----- 456
OsPFK09 427 IEMDEVAEAKNPVDTRHKKAWVRSVFNQPDFIRAGPTS----- 465
ThPFK 425 VETKVAATSVRRVLDLRGQLRQVREITVLDLGSVDVRLARKLEIRELEAINRNRDRLHEELAKL----- 487
Clustal Consensus 79 .*. . : . * : 83

```

|                      |     |                              |     |
|----------------------|-----|------------------------------|-----|
| Solyc04g014270.2.1   | 533 | -----                        | 533 |
| Solyc11g010450.1.1   | 532 | -----                        | 532 |
| AtPFK5               | 537 | -----                        | 537 |
| Medtr5g032570.1      | 533 | -----                        | 533 |
| Medtr8g069040.1      | 529 | -----                        | 529 |
| OsPFK07              | 535 | -----                        | 535 |
| Bradi3g37020.1.p     | 530 | -----                        | 530 |
| Sobic.007G139500.1.p | 527 | -----                        | 527 |
| Sobic.002G201700.1.p | 529 | -----                        | 529 |
| Bradi4g30260.1.p     | 531 | -----                        | 531 |
| OsPFK08              | 527 | -----                        | 527 |
| OsPFK10              | 524 | -----                        | 524 |
| Sobic.001G253300.1.p | 524 | -----                        | 524 |
| Bradi3g25910.2.p     | 526 | -----                        | 526 |
| Cre06.g262900.t1.2   | 529 | -----                        | 529 |
| Vocar20003037m       | 523 | -----                        | 523 |
| Cre12.g553250.t1.2   | 512 | -----                        | 512 |
| Vocar20006307m       | 513 | -----                        | 513 |
| Medtr6g090130.1      | 488 | CLAPLAVPVLRTGGISGV-----      | 505 |
| Medtr8g102190.1      | 475 | -----                        | 475 |
| AtPFK3               | 489 | K-----                       | 489 |
| AtPFK7               | 485 | K-----                       | 485 |
| Sobic.010G041400.1.p | 539 | -----                        | 539 |
| Bradi1g49300.2.p     | 548 | NGVK-----                    | 551 |
| OsPFK06              | 556 | AVK-----                     | 558 |
| AtPFK1               | 473 | -----                        | 473 |
| Solyc08g066100.2.1   | 492 | LLPCLSCGQ-----               | 500 |
| Solyc12g095880.1.1   | 485 | -----                        | 485 |
| Medtr3g110395.1      | 492 | PTQLMEGDKSKDNQKSRNLADSDSCIKK | 519 |
| AtPFK6               | 462 | -----                        | 462 |
| Solyc04g072580.1.1   | 480 | INEANKNKEPPELSDGETN-----     | 499 |
| Solyc07g045160.2.1   | 489 | TF-----                      | 490 |
| OsPFK01              | 525 | NGTAAAPV-----                | 531 |
| Sobic.003G034700.1.p | 527 | NGTV-----                    | 530 |
| Bradi2g05720.1.p     | 536 | NGFAAPL-----                 | 542 |
| OsPFK04              | 529 | ANAGDRAALCNGAA-----          | 542 |
| Bradi2g33290.1.p     | 523 | MNGHGHF-----                 | 530 |
| Sobic.001G052500.1.p | 528 | DVQRANGNHL-----              | 538 |
| Sobic.009G071800.1.p | 526 | NGNHLCSGAA-----              | 536 |
| Medtr2g100710.1      | 465 | -----                        | 465 |
| OsPFK02              | 559 | EK-----                      | 560 |
| Bradi2g49280.1.p     | 558 | ESANGEK-----                 | 564 |
| Sobic.003G290000.1.p | 561 | -----                        | 561 |
| Sobic.009G204600.1.p | 567 | SSNGEI-----                  | 573 |
| Bradi2g19326.2.p     | 547 | SSSNGEI-----                 | 553 |
| OsPFK05              | 561 | SSSNSQI-----                 | 567 |
| AtPFK4               | 530 | -----                        | 530 |
| Solyc03g093520.2.1   | 539 | -----                        | 539 |
| Medtr1g090300.1      | 543 | -----                        | 543 |
| Sobic.006G114700.1.p | 484 | -----                        | 484 |
| Bradi5g12982.1.p     | 468 | -----                        | 468 |
| OsPFK03              | 266 | -----                        | 266 |
| AtPFK2               | 444 | -----                        | 444 |
| Medtr4g134290.1      | 460 | -----                        | 460 |
| Solyc04g015200.2.1   | 456 | -----                        | 456 |
| OsPFK09              | 465 | -----                        | 465 |
| TbPFK                | 487 | -----                        | 487 |
| Clustal Consensus    | 83  | -----                        | 83  |

**Supplementary Figure S4 (next page):** Significance of the remaining conserved Cys for redox regulation. Cys to serine single and double mutations were introduced into *A. thaliana* AtPFK5 (A) and AtPFK3 (B;C). The variants were transiently overexpressed in tobacco leaves. PFKs from the tobacco leaf samples were extracted with buffer containing 5 mM  $\beta$ -mercaptoethanol ( $\beta$ -ME). After initial activity determination, samples were oxidized with 2.5 mM sodium tetrathionate (TT) for 20 min, and afterwards re-reduced with 5 mM dithiothreitol (DTT). Upper case letters indicate significant differences for each isoform to buffer and GFP control, lower case letters indicate significant differences among treatments for each isoform at  $p < 0.05$  (ANOVA, Post-hoc Tukey test,  $n=3-6$ ). The results are means  $\pm$  SD. (D-F) Details of the protein alignment of conserved Cys in PFKs from *A. thaliana* and *O. sativa*. The mutated Cys are marked with an arrow.

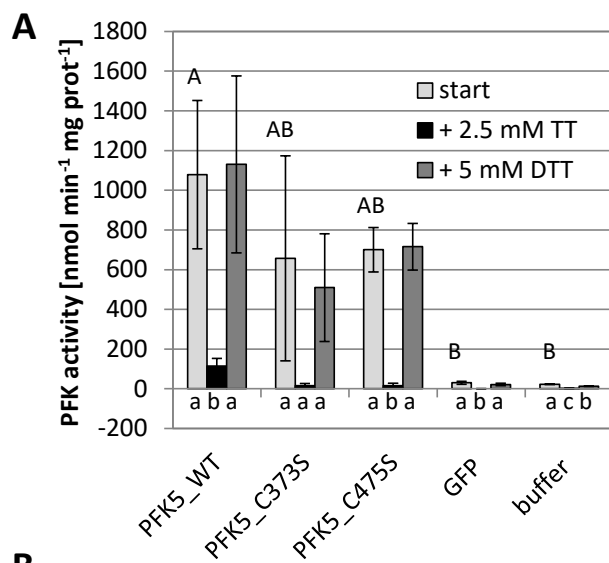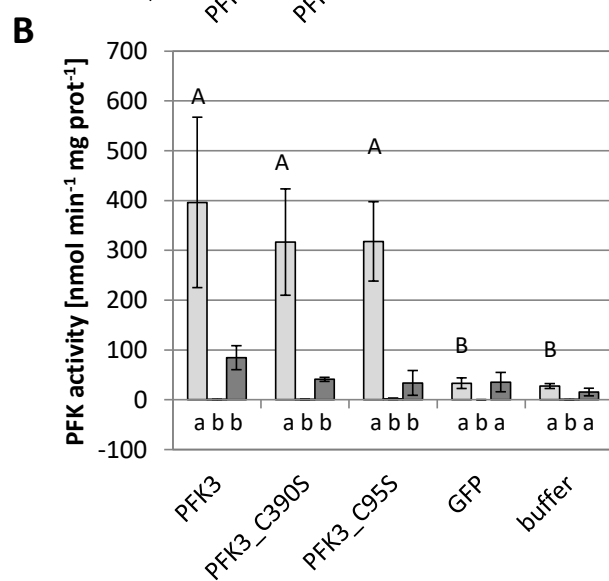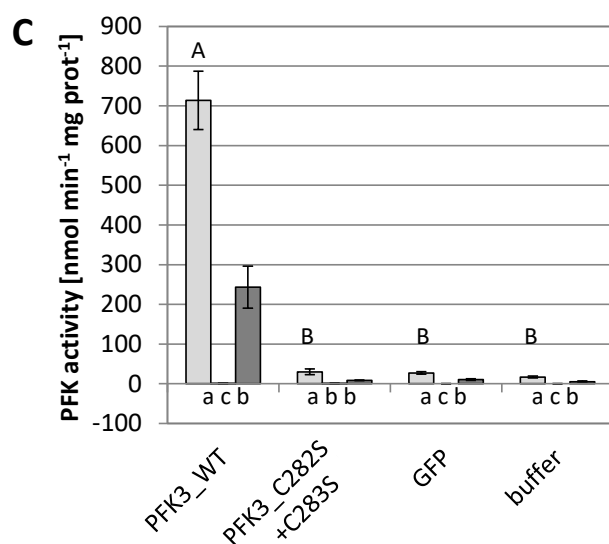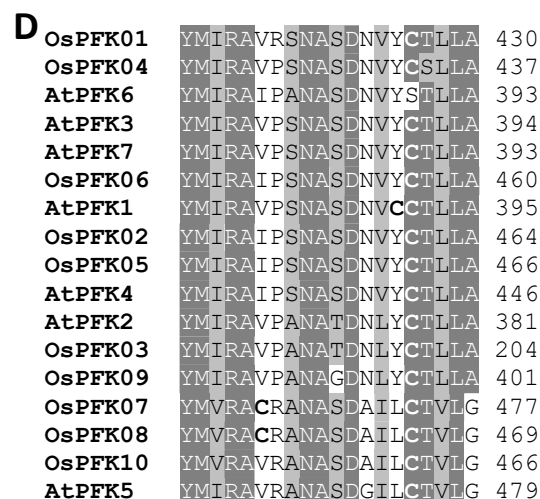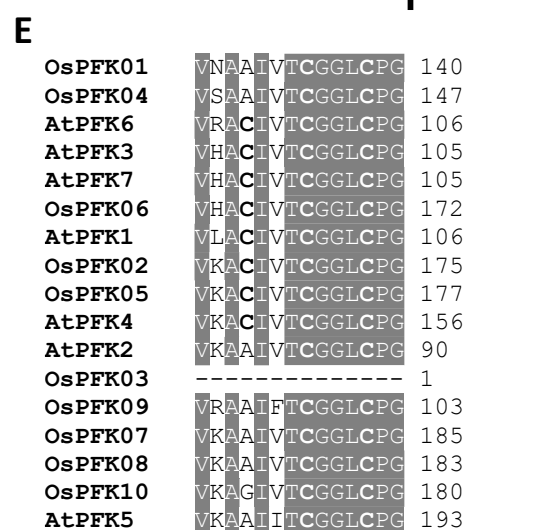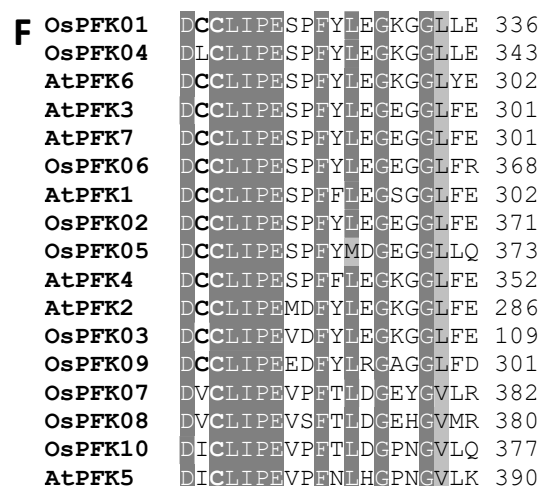

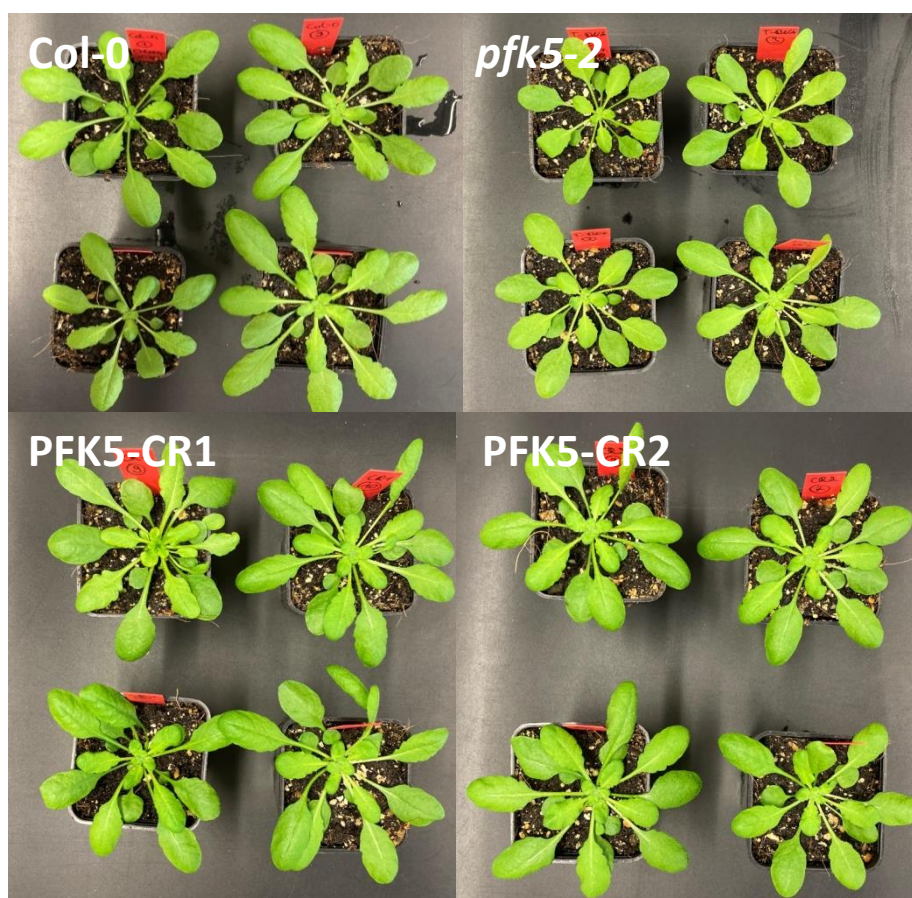

**Supplementary Figure S5:** Representative pictures of five-week-old *pfk5-CR1*, *pfk5-CR2*, *pfk5-2* and wildtype Col-0 plants grown on soil (representative pictures from the experiment in Figure 9C). One pot has the width of 5.3 cm.

At2g22480 264044\_at

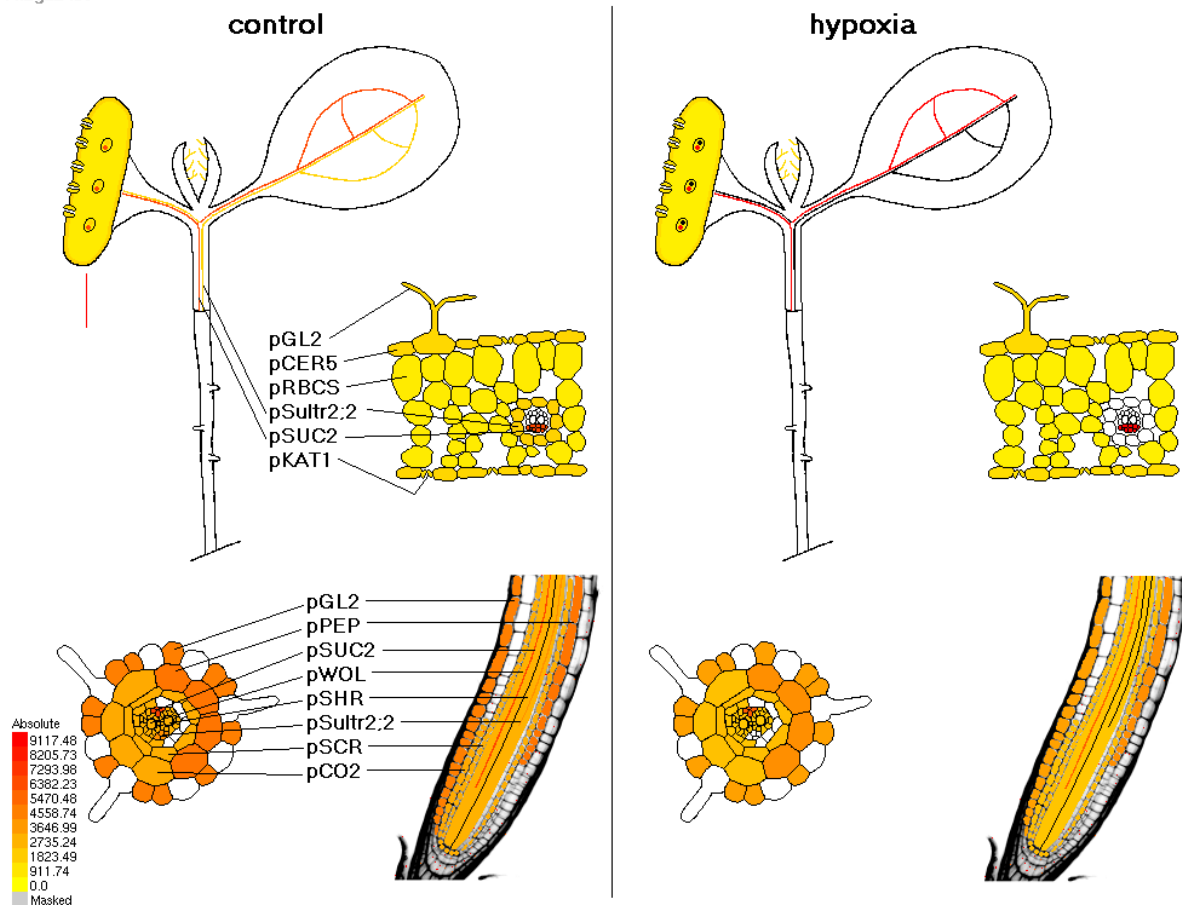

**Supplementary Figure S6:** Expression atlas of *AtPFK5* from the eFP browser (<http://bar.utoronto.ca/>, Winter et al. 2007, Mustroph et al. 2009).



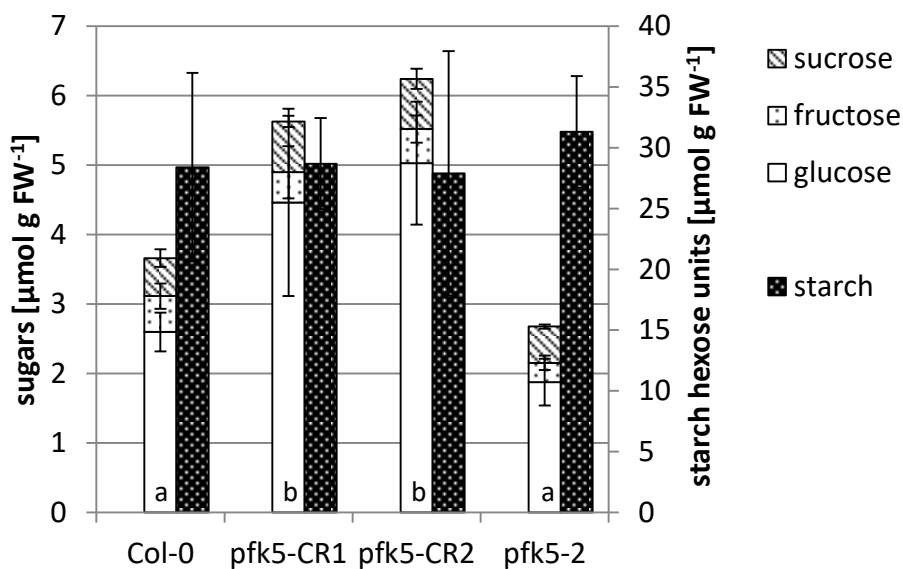

**Supplementary Figure S7:** Sugar content in leaves of five-week-old *pfk5-CR1*, *pfk5-CR2*, *pfk5-2* and wildtype Col-0 plants grown on soil, harvested at the end of the day. Data are means  $\pm$  SD of  $n=4$ . Letters indicate significant differences at  $p < 0.05$  for glucose content (ANOVA, Post-hoc Tukey test). Fructose, sucrose and starch contents were not significantly different between genotypes.

**Supplementary Table S1 (separate Excel file):** Primer sequences (a) and Protein IDs (b) used in this study

#### Supplementary References:

- Huerta-Cepas J, Serra F, Bork P (2016) ETE 3: Reconstruction, Analysis, and Visualization of Phylogenomic Data. *Mol Biol Evol* 33: 1635-1638.
- Mustroph A, Zanetti ME, Jang CJ, Holtan HE, Repetti PP, Galbraith DW, et al. (2009) Profiling translomes of discrete cell populations resolves altered cellular priorities during hypoxia in Arabidopsis. *Proc Natl Acad Sci USA* 106: 18843-18848.
- Winter D, Vinegar B, Nahal H, Ammar R, Wilson GV, Provart NJ (2007) An "Electronic Fluorescent Pictograph" browser for exploring and analyzing large-scale biological data sets. *PLoS One* 2: e718.
